# Supplementary material for: Application of Synchronous Text-Based Dialogue Systems in Mental Health Interventions: Systematic Review
Source: PubMed Central journal article supplement (PMC5595406; doi:10.2196/jmir.7023), 2017-07-21
Supplement: jmir_v19i8e267_app3.pdf [file jmir_v19i8e267_app3.pdf]

Multimedia Appendix 1. Summary of efficacy studies of synchronous text-based psychological interventions.

| Study                                       | Population or sample                                                                                                                                                                                                 | Design (eg, RCT <sup>a</sup> ) | Eligibility criteria (specific diagnosis)                                                                          | Intervention and duration (eg, single session, 6 week program)                                                                                                                                                   | Control condition (eg, TAU <sup>b</sup> )                                                                                                                                                           | Attrition                                                                                                                                                                                                                                                                                                             | Main findings                                                                                                                                                                                                                                                                                                                                                                                                                                                                       |
|---------------------------------------------|----------------------------------------------------------------------------------------------------------------------------------------------------------------------------------------------------------------------|--------------------------------|--------------------------------------------------------------------------------------------------------------------|------------------------------------------------------------------------------------------------------------------------------------------------------------------------------------------------------------------|-----------------------------------------------------------------------------------------------------------------------------------------------------------------------------------------------------|-----------------------------------------------------------------------------------------------------------------------------------------------------------------------------------------------------------------------------------------------------------------------------------------------------------------------|-------------------------------------------------------------------------------------------------------------------------------------------------------------------------------------------------------------------------------------------------------------------------------------------------------------------------------------------------------------------------------------------------------------------------------------------------------------------------------------|
| S1. Blankers et al (2011), Netherlands [18] | <p>N=205 adults with drinking problems</p> <p>Therapy alcohol online n=68, Age: mean=41.9; 49% male</p> <p>Internet-based self-help n=68, Age: mean=41.1, 49% male</p> <p>Waitlist n=69, Age mean=43.7, 51% male</p> | RCT                            | 18 years or older; AUDIT <sup>c</sup> score>8 to report drinking an average of more than 14 standard drinks a week | <p>Synchronous Web-based therapy based on CBT<sup>d</sup> and motivation interviewing conducted in up to 7 text-based chat-therapy sessions (TAO<sup>f</sup>)</p> <p>Assessments at baseline, 3 and 6 months</p> | <p>Self-help Alcohol Online, a fully automated treatment intervention based on CBT and motivational interviewing (SAO<sup>g</sup>)</p> <p>Untreated waiting-list control group (WL<sup>h</sup>)</p> | <p>TAO=36% at 3 months did not complete assessments, 40% at 6 months did not complete assessments</p> <p>SAO=30% at 3 months did not complete assessments; 43% at 6 months did not complete assessments</p> <p>WL= 26% at 3 months did not complete assessments, and 38% at 6 months did not complete assessments</p> | <p>Alcohol consumption: significant effects for TAO versus WL (<math>P=.002</math>) and for SAO versus WL (<math>P=.03</math>) on alcohol consumption at 3 months</p> <p>Differences between TAO and SAO were not significant at 3 months (<math>P=.11</math>) but were significant at 6 months (<math>P=.03</math>), with larger effects obtained for TAO</p> <p>QOLS<sup>h</sup> score: differences between TAO and WL were significant at 3 months (<math>P=.11</math>) with</p> |

|                                               |                                                                                                   |     |                                                         |                                                                                           |                                                                            |                                                                                                                                                                           |                                                                                                                                                                                           |
|-----------------------------------------------|---------------------------------------------------------------------------------------------------|-----|---------------------------------------------------------|-------------------------------------------------------------------------------------------|----------------------------------------------------------------------------|---------------------------------------------------------------------------------------------------------------------------------------------------------------------------|-------------------------------------------------------------------------------------------------------------------------------------------------------------------------------------------|
|                                               |                                                                                                   |     |                                                         |                                                                                           |                                                                            |                                                                                                                                                                           | larger effects obtained for TAO<br><br>Differences between TAO and SAO were not significant at 3 months ( $P=.37$ ) but were at 6 months ( $P=.02$ ) with larger effects obtained for TAO |
| S2. Cohen and Kerr (1999), United States [19] | N=24 Adolescents and adults (self-identified as wanting help for dealing with anxiety)            | RCT | Help-seeking for anxiety                                | Single session<br><br>Sessions conducted by psychology graduate students                  | TAU (face-to-face)                                                         |                                                                                                                                                                           | Anxiety: STAI <sup>l</sup> scores reduced significantly for both groups (chat and face-to-face)<br><br>No significant differences between intervention groups                             |
| S3. Crutzen et al (2014), Netherlands [20]    | N=12 Adolescents with psychosocial problems<br><br>Web-based chat (n=5)<br><br>Face-to-face (n=7) | RCT | SDQ <sup>l</sup> total score of 12 or higher on the SDQ | Three Web-based chat consultations with a YHC <sup>k</sup> worker (over a 3 month period) | Three face-to-face consultations with a YHC worker (over a 3 month period) | N=360 were invited to join the study; N=70 met secondary exclusion criteria<br><br>n=165 declined to participate; n=74 not invited to participate; n=12 wrongly excluded; | Trial abandoned due to low recruitment rates                                                                                                                                              |

|                                                 |                                                                                                                                             |                                              |                              |                                                                                                                                                                                      |  |                                                                                                                                                                                                                                                                                                                                             |                                                                                                                                                                                                                                                                                                                                                                                                                                                                            |
|-------------------------------------------------|---------------------------------------------------------------------------------------------------------------------------------------------|----------------------------------------------|------------------------------|--------------------------------------------------------------------------------------------------------------------------------------------------------------------------------------|--|---------------------------------------------------------------------------------------------------------------------------------------------------------------------------------------------------------------------------------------------------------------------------------------------------------------------------------------------|----------------------------------------------------------------------------------------------------------------------------------------------------------------------------------------------------------------------------------------------------------------------------------------------------------------------------------------------------------------------------------------------------------------------------------------------------------------------------|
|                                                 |                                                                                                                                             |                                              |                              |                                                                                                                                                                                      |  | n=10 no information;<br>n=17 drop out before participation                                                                                                                                                                                                                                                                                  |                                                                                                                                                                                                                                                                                                                                                                                                                                                                            |
| S4. Dowling and Rickwood (2015), Australia [21] | N=152 adolescents and adults who accessed a mental health website<br><br>Age range: 16-25 years, Mean=17 (SD <sup>1</sup> 2.45); 12.2% male | Naturalistic study with pre or post measures | The age range of 16-25 years | Web-based support provided by fully qualified and supervised mental health clinicians, for example, psychologists, mental health nurses, occupational therapists, and social workers |  | N=506 completed baseline survey<br><br>n=354 (70%, 354/506) did not complete a therapy session<br><br>n=152 accessed Web-based chat website and responded to follow-up<br><br>Of these, n=38 (25%, 38/152) did not progress to have a Web-based session;<br>n=62 (40.8%, 62/152) had one session;<br>n= 52 (34.2%, 52/152) had 2-5 sessions | No differences between participants at baseline<br><br>Psychological distress: all participants improved significantly with moderate to large ES <sup>m</sup> for time ( $P<.001$ , partial $\eta^2=.118$ ) regardless of amount of counseling received<br><br>Life satisfaction: a significant though small ES for time, with an increase in life satisfaction for all groups. ( $P=.009$ , partial $\eta^2=.046$ ). No differences were found according to the amount of |

|                                                          |                                                                                                                                                                                                                                                                                    |                                |                                |                                                                                             |                                     |                                                                                                                                                            |                                                                                                                                                                                                                                                                                                                    |
|----------------------------------------------------------|------------------------------------------------------------------------------------------------------------------------------------------------------------------------------------------------------------------------------------------------------------------------------------|--------------------------------|--------------------------------|---------------------------------------------------------------------------------------------|-------------------------------------|------------------------------------------------------------------------------------------------------------------------------------------------------------|--------------------------------------------------------------------------------------------------------------------------------------------------------------------------------------------------------------------------------------------------------------------------------------------------------------------|
|                                                          |                                                                                                                                                                                                                                                                                    |                                |                                |                                                                                             |                                     |                                                                                                                                                            | <p>Web-based counseling received</p> <p>Hope: no main effects but participants with 1 (<math>P=.019</math>, <math>d=.25</math>) or more (<math>P=.008</math>, <math>d=.36</math>) session increased significantly with a small to medium ES</p>                                                                    |
| <p>S5. Fukkink and Hermanns (2009), Netherlands [22]</p> | <p>N=12,873 children who contacted helpline and answered 2 questions before intervention</p> <p>n=902 children and adolescents with first-post intervention questionnaire completed</p> <p>Age range 8-18 years</p> <p>Web-based chat: n=339</p> <p>Age: mean=13.8; 11.5% male</p> | <p>Naturalistic comparison</p> | <p>Aged less than 18 years</p> | <p>Single session</p> <p>Web-based chat</p> <p>Problem-solving based counseling session</p> | <p>TAU (telephone conversation)</p> | <p>11,971 did not complete postintervention questions</p> <p>At 1 month, 24.7% (223/902) available for follow-up: n=119 Web-based chat; n=94 telephone</p> | <p>Well-being increased for participants in both groups following intervention (<math>P&lt;.001</math>): Web-based chat (ES=0.62, medium) and telephone (ES=0.34, small)</p> <p>Perceived burden of problem decreased in both groups following intervention (<math>P&lt;.001</math>): Web-based chat (ES=0.44,</p> |

|  |                                                                 |  |  |  |  |                                                                                                                                                                                                                                                                                                                                                                                                                                                                                                                    |
|--|-----------------------------------------------------------------|--|--|--|--|--------------------------------------------------------------------------------------------------------------------------------------------------------------------------------------------------------------------------------------------------------------------------------------------------------------------------------------------------------------------------------------------------------------------------------------------------------------------------------------------------------------------|
|  | <p>Telephone<br/>n=563<br/>Age:<br/>mean=12;<br/>21.3% male</p> |  |  |  |  | <p>medium) and telephone (ES=0.12, small)</p> <p>Follow-up analysis at 1 month, showed that changes in well-being and perceived burden of the problem were stable for both intervention conditions</p> <p>Intervention comparison showed that Web-based chat was slightly more effective in both improving children's sense of well-being and decreasing the perceived burden of the problem</p> <p>Overall, children were satisfied with the support they received from both chat and telephone interventions</p> |
|--|-----------------------------------------------------------------|--|--|--|--|--------------------------------------------------------------------------------------------------------------------------------------------------------------------------------------------------------------------------------------------------------------------------------------------------------------------------------------------------------------------------------------------------------------------------------------------------------------------------------------------------------------------|

|                                                          |                                                                                                                                                                       |                                                                            |                                                                                                                                      |                                                                                                |                                     |                                                                                                    |                                                                                                                                                                                                                                                                                                                                                                    |
|----------------------------------------------------------|-----------------------------------------------------------------------------------------------------------------------------------------------------------------------|----------------------------------------------------------------------------|--------------------------------------------------------------------------------------------------------------------------------------|------------------------------------------------------------------------------------------------|-------------------------------------|----------------------------------------------------------------------------------------------------|--------------------------------------------------------------------------------------------------------------------------------------------------------------------------------------------------------------------------------------------------------------------------------------------------------------------------------------------------------------------|
| <p>S6. Fukkink and Hermanns (2009), Netherlands [23]</p> | <p>N=110<br/>Children and adolescents who contacted the helpline</p> <p>Age range 9-17 years</p> <p>Web-based chat n=53; 16% male</p> <p>Telephone n=42; 23% male</p> | <p>Selection of conversations from database either phone or chat based</p> | <p>Aged less than 18 years</p>                                                                                                       | <p>Single session<br/>Web-based chat</p> <p>Problem-solving based counseling session</p>       | <p>TAU (telephone conversation)</p> | <p>n=15 excluded conversations due to poor quality, or abrupt end to session</p>                   | <p>From selected conversations, children's well-being increased for both Web-based chat (ES=0.45, medium) and telephone interventions (ES=0.40, medium)</p> <p>Perceived burden of the problem decreased for online chat (ES=0.36, small) and telephone (ES=0.20, small)</p> <p>There were no significant differences between chat and telephone interventions</p> |
| <p>S7. Kessler et al (2009), United Kingdom [24]</p>     | <p>N=297 adults with depression</p> <p>Age range 18-75 years</p> <p>Intervention n=149</p>                                                                            | <p>RCT</p>                                                                 | <p>New episode of depression (diagnosed within preceding 4 weeks) and BDI score &gt;14</p> <p>No treatment for depression within</p> | <p>16 weeks duration</p> <p>CBT-based treatment with online therapist</p> <p>5-10 sessions</p> | <p>WL</p>                           | <p>Online CBT : At 4 months' follow-up, 92 (62%, 92/149) had completed the therapy as intended</p> | <p>At 4 months: intervention BDI mean 14.5 (SD 11.2), (ES=0.81, large)</p> <p>Study recovery criteria: n=43,</p>                                                                                                                                                                                                                                                   |

|                                       |                                                                                                                                                                                                  |                         |                                                                                                                       |                                                                                                              |                                   |                                                                                                                                                                                                                                                                                                                                                                    |                                                                                                                                                                                                                                                                                                                   |
|---------------------------------------|--------------------------------------------------------------------------------------------------------------------------------------------------------------------------------------------------|-------------------------|-----------------------------------------------------------------------------------------------------------------------|--------------------------------------------------------------------------------------------------------------|-----------------------------------|--------------------------------------------------------------------------------------------------------------------------------------------------------------------------------------------------------------------------------------------------------------------------------------------------------------------------------------------------------------------|-------------------------------------------------------------------------------------------------------------------------------------------------------------------------------------------------------------------------------------------------------------------------------------------------------------------|
|                                       | <p>Age: mean=35.6; 30% males</p> <p>WL control n=148</p> <p>Age mean=34.3; 33% males</p> <p>Web-based chat; BDI<sup>a</sup> mean=32.8, SD=8.3</p> <p>Waitlist control; BDI mean=33.5, SD=9.3</p> |                         | <p>the preceding 3 months</p> <p>No history of bipolar disorder, psychotic disorder, alcohol, or substance misuse</p> | 55 min per session                                                                                           |                                   | <p>Data was collected for n=113 (76%, 113/149) of the intervention group</p> <p>At 8 months' follow-up, n=99 (66%, 99/149) had completed the therapy as intended</p> <p>Only 19 (13%, 19/149) received no sessions of therapy, nearly half n=70/149 had had at least eight sessions</p> <p>Data was collected for 109 (73%, 109/149) of the intervention group</p> | <p>(38%) reported a BDI of &lt;10;</p> <p>WL BDI mean 22.0 (SD 13.5), and n=23 (24%) met BDI recovery criteria</p> <p>At 8 months: intervention BDI mean 14.7 (SD 11.6), (ES=0.70, large), Study recovery criteria met by: n=46 (42%)</p> <p>WL BDI mean 22.2 (SD 15.2); n=26 (26%) met BDI recovery criteria</p> |
| S8. King et al (2006), Australia [25] | <p>N=186 children seeking counseling</p> <p>Web-based chat n=86;</p> <p>Age: mean=15.4; 5% male</p>                                                                                              | Naturalistic comparison |                                                                                                                       | <p>Single session; Counseling focused on information gathering and problem solving. Duration: 50-80 min.</p> | TAU—telephone duration: 45-60 min |                                                                                                                                                                                                                                                                                                                                                                    | <p>Distress: GHQ-12<sup>o</sup> significantly reduced in both conditions (partial eta squared=0.50, large)</p> <p>Session impact: Higher</p>                                                                                                                                                                      |

|                                            |                                                                              |     |                                                                                                        |                                                                                                                                                                                                                                                                                                                                                                                                                                                                             |     |                                                                                                                                                                                                                                                                                                                                                      |                                                                                                                                                                                                                                                                                                                                                                                                                                                                                              |
|--------------------------------------------|------------------------------------------------------------------------------|-----|--------------------------------------------------------------------------------------------------------|-----------------------------------------------------------------------------------------------------------------------------------------------------------------------------------------------------------------------------------------------------------------------------------------------------------------------------------------------------------------------------------------------------------------------------------------------------------------------------|-----|------------------------------------------------------------------------------------------------------------------------------------------------------------------------------------------------------------------------------------------------------------------------------------------------------------------------------------------------------|----------------------------------------------------------------------------------------------------------------------------------------------------------------------------------------------------------------------------------------------------------------------------------------------------------------------------------------------------------------------------------------------------------------------------------------------------------------------------------------------|
|                                            | Telephone<br>n=100<br>Age:<br>mean=13.1;<br>33% male                         |     |                                                                                                        |                                                                                                                                                                                                                                                                                                                                                                                                                                                                             |     |                                                                                                                                                                                                                                                                                                                                                      | SIS <sup>p</sup> for TAU<br>(telephone)<br>compared with<br>Web-based<br>chat (partial<br>eta<br>squared=0.15)                                                                                                                                                                                                                                                                                                                                                                               |
| S9. Kordy et al<br>(2016),<br>Germany [26] | N=232<br><br>SUMMIT<br>n=77<br><br>SUMMIT-<br>PERSON<br>n=79<br><br>TAU n=80 | RCT | DSM-IV <sup>q</sup> criteria<br>for MDD <sup>r</sup> with 3<br>or more major<br>depressive<br>episodes | Over 12<br>months,<br>participants in<br>both<br>intervention<br>arms received,<br>in addition to<br>TAU, the<br>SUMMIT<br>intervention<br>which<br>comprised<br>intense<br>monitoring via<br>email or a<br>mobile phone,<br>including<br>signaling of<br>upcoming<br>crises,<br>assistance with<br>personal crisis<br>management,<br>and facilitation<br>of early<br>intervention<br><br>SUMMIT-<br>PERSON<br>additionally<br>offered access<br>to regular<br>expert chats | TAU | n=8 (3.4%)<br>participants<br>discontinued<br>participation:<br>(TAU: n=5;<br>SUMMIT: n=3)<br><br>n=17 no<br>interview data<br><br>n=1 (TAU) was<br>interviewed only<br>once because his<br>index treatment<br>lasted 5.5<br>months<br><br>Lost to follow-<br>up:<br>6 months: n=20;<br>12 months:<br>n=10;<br>18 months:<br>n=12;<br>24 months: n=0 | SUMMIT<br>compared with<br>TAU reduced<br>the time with<br>an unwell<br>status (OR <sup>s</sup><br>0.48; 95% CI<br>0.23-0.98)<br>through faster<br>transitions<br>from unwell to<br>well<br>(OR 1.44; 95%<br>CI 0.83-2.50)<br>and slower<br>transitions<br>from well to<br>unwell (OR<br>0.69; 95% CI<br>0.44-1.09)<br><br>SUMMIT-<br>PERSON was<br>not superior to<br>either<br>SUMMIT<br>(OR 0.77; 95%<br>CI 0.38-1.56)<br>or TAU (OR<br>0.62; 95% CI<br>0.31-1.24)<br><br>The efficacy of |



|                                            |                                                                                                 |                    |                                                                                                                           |                                                                                            |    |                                                                                                                                                                                                                      |                                                                                                                                                                                                                                    |
|--------------------------------------------|-------------------------------------------------------------------------------------------------|--------------------|---------------------------------------------------------------------------------------------------------------------------|--------------------------------------------------------------------------------------------|----|----------------------------------------------------------------------------------------------------------------------------------------------------------------------------------------------------------------------|------------------------------------------------------------------------------------------------------------------------------------------------------------------------------------------------------------------------------------|
|                                            |                                                                                                 |                    |                                                                                                                           |                                                                                            |    |                                                                                                                                                                                                                      | <p>SUMMIT was strongest 8 months after the intervention</p> <p>The accumulated gains are illustrated by the median proportions of well weeks: 52% in SUMMIT and 48% in SUMMIT-PERSON versus 31% in TAU alone</p>                   |
| S10. Kramer et al (2014), Netherlands [27] | <p>N=263 adolescents with depressive symptoms</p> <p>Intervention (n=131)</p> <p>WL (n=132)</p> | RCT                | 12-22 years of age; a CES-D' score of 22 or higher (the cut-off to detect possible cases of depression among adolescents) | Generally limited to 5 chat sessions of Solution-Focused Brief Therapy called PratenOnline | WL | <p>N=592</p> <p>Excluded: n=329: CES-D&lt;22; no consent signed n=265; baseline not completed n=39</p> <p>9 weeks: n=111 (42%); n=56 (praten); n=55 (WL)</p> <p>4.5months: n=131 (50%); n=58 (praten); n=76 (WL)</p> | PratenOnline showed significantly greater improvement in CES-D scores than the WL at both 9 weeks and 4.5 months with a small ES at 9 weeks (d=0.18, 95% CI -0.10 to 0.47) and a large ES at 4.5 months (d=0.79, 95% CI 0.45-1.08) |
| S11. Lelutiu-Weinberger et                 | N=41 males who have had                                                                         | Naturalistic study | Male, aged between 18-29                                                                                                  | Weekly sessions up to                                                                      |    | N=146 eligibility                                                                                                                                                                                                    | No significant change in                                                                                                                                                                                                           |

|                                              |                                                                                                                                                      |                                |                                                                                                                                                                                           |                                                                                                                                                         |                                                        |                                                                                                                                                                                              |                                                                                                                                                                                                                                                                                                                                        |
|----------------------------------------------|------------------------------------------------------------------------------------------------------------------------------------------------------|--------------------------------|-------------------------------------------------------------------------------------------------------------------------------------------------------------------------------------------|---------------------------------------------------------------------------------------------------------------------------------------------------------|--------------------------------------------------------|----------------------------------------------------------------------------------------------------------------------------------------------------------------------------------------------|----------------------------------------------------------------------------------------------------------------------------------------------------------------------------------------------------------------------------------------------------------------------------------------------------------------------------------------|
| <p>al (2015), United States [28]</p>         | <p>sex with men<br/>Age range: 18-29 years</p> <p>MiCHAT:<br/>n=31<br/>Age: mean 25 (SD 3.2)</p> <p>Non attendance:<br/>n=10</p>                     |                                | <p>years, negative or unknown HIV<sup>u</sup> status, had used drugs <math>\geq 5</math> occasions in the last 90 days, at least one incidence of condomless anal sex in last 90 days</p> | <p>8 1-h motivational interviewing and cognitive behavioral skills-based Web-based live chat sessions</p>                                               |                                                        | <p>screenings</p> <p>Eligible: n=41<br/>Intervention: Attended <math>\geq 1</math> session n=31</p> <p>Completed follow-up n=22</p> <p>No session attended n=10; Completed follow-up n=5</p> | <p>depression or anxiety symptom ratings:</p> <p>Brief Symptom Inventory Scale:<br/>Depressive symptoms<br/>Baseline mean 14.48 (SD 6.37) Follow-up: mean 13.37 (SD 6.00) (<math>P=.19</math>)<br/>D=0.10</p> <p>Anxious symptoms<br/>Baseline mean 13.29 (SD 6.59) Follow-up: mean 13.1 (SD 6.83) (<math>P=.88</math>)<br/>D=0.03</p> |
| <p>S12. Murphy et al (2009), Canada [29]</p> | <p>N=127 adults who contacted an employee and family assistance program provider via phone</p> <p>Web-based chat n=26<br/>Age: mean=42; 27% male</p> | <p>Naturalistic comparison</p> |                                                                                                                                                                                           | <p>Therapy Online counselors gave online counseling</p> <p>Intervention unclear</p> <p>Counseling provided by Interlock Masters level counselors or</p> | <p>TAU (face-to-face) Interlock counselors as well</p> | <p>n=44 Web-based participants completed satisfaction survey, n= 26 completed pre or post GAF<sup>v</sup> ratings</p>                                                                        | <p>GAF increased from pre to post intervention significantly in both conditions. Effect size not specified</p> <p>No group by time interaction</p>                                                                                                                                                                                     |

|                                        |                                                                                                                                                                                                                                                          |     |                                                                                                                                                                                                                                       |                                                                                                                                                                        |    |                                                                                                                                                                                                                                                                                                                                                             |                                                                                                                                                                                                                                                                                                                                                                                                                                   |
|----------------------------------------|----------------------------------------------------------------------------------------------------------------------------------------------------------------------------------------------------------------------------------------------------------|-----|---------------------------------------------------------------------------------------------------------------------------------------------------------------------------------------------------------------------------------------|------------------------------------------------------------------------------------------------------------------------------------------------------------------------|----|-------------------------------------------------------------------------------------------------------------------------------------------------------------------------------------------------------------------------------------------------------------------------------------------------------------------------------------------------------------|-----------------------------------------------------------------------------------------------------------------------------------------------------------------------------------------------------------------------------------------------------------------------------------------------------------------------------------------------------------------------------------------------------------------------------------|
|                                        | Face-to-face<br>n=101<br>Age:<br>mean=44;<br>24% male                                                                                                                                                                                                    |     |                                                                                                                                                                                                                                       | social workers                                                                                                                                                         |    |                                                                                                                                                                                                                                                                                                                                                             |                                                                                                                                                                                                                                                                                                                                                                                                                                   |
| S13. Schaub et al (2015), Germany [30] | <p>N=308 adults with problematic cannabis use</p> <p>Self help + chat: n=114<br/>Age: mean 28.4 (SD 9.6); 69.3% male</p> <p>Self help – chat: n=101<br/>Age: mean 30.2 (SD 9.2); 76.2% male</p> <p>WL: n=93<br/>Age: mean 29.8 (SD 10.0); 75.3% male</p> | RCT | <p>Age 18 years or older</p> <p>Cannabis use at least weekly in the last 30 days</p> <p>No history of serious psychiatric disorder</p> <p>Not pregnant</p> <p>Not currently undertaking other treatment for cannabis use disorder</p> | <p>6 weeks of self-help covering 8 modules based on principles of motivational interviewing and self-control practices with or without chat with trained counselor</p> | WL | <p>N=436 recruited</p> <p>Self help + chat: n=87 (76%, 87/114) did not complete chat component of intervention: No response: n=49; Other reason: n=3; No reason indicated by therapist: n=35</p> <p>Follow-up: n=76 (66.6%, 76/114) no response</p> <p>Self help – chat: Follow-up: n=61 (60%) no response</p> <p>WL: Follow-up: n=55 (59%) no response</p> | <p>Compared with cannabis use from Swiss treatment monitoring statistics (act-info) in 2013, participants reported similar gender distribution though they tended to be older and reported higher cannabis use rates for the previous 7 days</p> <p>Groups did not differ on demographic and drug use measures with the exception of number of years of cannabis use</p> <p>At 3 month follow-up: mean cannabis use days/week</p> |

|  |  |  |  |  |  |  |                                                                                                                                                                                                                                                                                                                                                                                                                                                                                                                                                                                                                                   |
|--|--|--|--|--|--|--|-----------------------------------------------------------------------------------------------------------------------------------------------------------------------------------------------------------------------------------------------------------------------------------------------------------------------------------------------------------------------------------------------------------------------------------------------------------------------------------------------------------------------------------------------------------------------------------------------------------------------------------|
|  |  |  |  |  |  |  | <p>differed between self-help – chat versus self-help + chat (beta= -0.75, SE<sup>v</sup>=0.32, <math>t=-2.39</math>, <math>P=.02</math>, <math>d=0.34</math>, 95% CI 0.07-0.61), and between self-help + chat versus WL (beta=.70, SE=0.32, <math>t=2.16</math>, <math>P=.03</math>, <math>d=0.20</math>, 95% CI -0.07 to 0.47), but not between self-help - chat versus WL (beta=-0.05, SE=0.33, <math>t=-0.16</math>, <math>P=.87</math>, <math>d=-0.14</math>, 95% CI -0.43 to 0.14)</p> <p>No significant differences in the group comparisons in the mental health outcomes. Slight improvements in mental health (MHI-</p> |
|--|--|--|--|--|--|--|-----------------------------------------------------------------------------------------------------------------------------------------------------------------------------------------------------------------------------------------------------------------------------------------------------------------------------------------------------------------------------------------------------------------------------------------------------------------------------------------------------------------------------------------------------------------------------------------------------------------------------------|

|                                            |                                                                                                                                      |                    |                                                                                                                                                                                                                           |                                                                                                                                     |  |              |                                                                                                                                                                                               |
|--------------------------------------------|--------------------------------------------------------------------------------------------------------------------------------------|--------------------|---------------------------------------------------------------------------------------------------------------------------------------------------------------------------------------------------------------------------|-------------------------------------------------------------------------------------------------------------------------------------|--|--------------|-----------------------------------------------------------------------------------------------------------------------------------------------------------------------------------------------|
|                                            |                                                                                                                                      |                    |                                                                                                                                                                                                                           |                                                                                                                                     |  |              | 5 <sup>g</sup> ), Cannabis Use Disorder Identification Test, and severity of dependence scale in all 3 groups were reported (pre or post comparisons not reported)                            |
| S14. Wentz and Krevers (2012), Sweden [31] | N=12 adolescents and adults with ADHD <sup>y</sup> and/or an autism spectrum disorder<br><br>Age range: 15-26 years mean: 20.1 years | Naturalistic study | Aged 15-26 years<br>Diagnosis of ASD <sup>z</sup> and/or ADHD, autistic disorder, Asperger disorder<br><br>Not currently diagnosed with substance abuse or dependence, depression or psychosis, low intelligence quotient | Maximum 14 session over 8-weeks<br>Web-based support and coaching was offered at fixed times twice a week, 30 min to 1h per session |  | n=2 withdrew | Difference between baseline with 6-month follow-up showed significant increases on self-esteem ( $P=.02$ ), sense of coherence ( $P=.04$ ), and subjective global quality of life ( $P=.03$ ) |

<sup>a</sup>RTC: randomized controlled trial.

<sup>b</sup>TAU: treatment as usual.

<sup>c</sup>AUDIT: Alcohol Use Disorders Identification Test.

<sup>d</sup>CBT: cognitive behavioral therapy.

<sup>e</sup>WL: waitlist.

<sup>f</sup>TAO: Therapy Alcohol Online;

<sup>g</sup>SAO: Self-help Alcohol Online

<sup>h</sup>QOLS: Quality of Life Scale.

<sup>i</sup>STAI: State-Trait Anxiety Inventory.

<sup>j</sup>SDQ: The Strengths and Difficulties Questionnaire.

<sup>k</sup>YHC: youth health care.

<sup>l</sup>SD: standard deviation.

<sup>m</sup>ES: effect size.

<sup>n</sup>BDI: Beck Depression Inventory.

<sup>o</sup>GHQ-12: 12-item General Health Questionnaire.

<sup>p</sup>SIS: Session Impact Scale

<sup>q</sup>DSM-IV: Diagnostic and Statistical Manual of Mental Disorders, 4th edition.

<sup>r</sup>MDD: major depressive disorder.

<sup>s</sup>OR: odds ratio.

<sup>t</sup>CES-D: Center for Epidemiologic Studies Depression Scale

<sup>u</sup>HIV: human immunodeficiency virus.

<sup>v</sup>GAF: Global Assessment of Functioning.

<sup>w</sup>SE: standard error.

<sup>x</sup>MHI-5: 5-item Mental Health Inventory.

<sup>y</sup>ADHD: Attention-deficit/hyperactivity disorder.

<sup>z</sup>ASD: Autism spectrum disorder.

## References

18. Blankers M, Koeter MW, Schippers GM. Internet therapy versus internet self-help versus no treatment for problematic alcohol use: a randomized controlled trial. *J Consult Clin Psychol* 2011 Jun; 79(3):330-341
19. Cohen GE, Kerr BA. Computer-Mediated Counseling. *Computers in Human Services* 1999; 15(4):13-26
20. Crutzen R, Bosma H, Havas J, Feron F. What can we learn from a failed trial: insight into non-participation in a chat-based intervention trial for adolescents with psychosocial problems. *BMC Res Notes* 2014 Nov 20; 7:824
21. Dowling M, Rickwood D. A naturalistic study of the effects of synchronous online chat counselling on young people's psychological distress, life satisfaction and hope. *Counsell Psychother Res J* 2015; 15(4):274-283
22. Fukkink RG, Hermanns JM. Children's experiences with chat support and telephone support. *J Child Psychol Psychiatry* 2009 Jun; 50(6):759-66
23. Fukkink R, Hermanns J. Counseling children at a helpline: chatting or calling?. *J Community Psychol* 2009; 37(8):939-948
24. Kessler D, Lewis G, Kaur S, Wiles N, King M, Weich S, Sharp DJ, Araya R, Hollinghurst S, Peters TJ. Therapist-delivered internet psychotherapy for depression in primary care: a randomised controlled trial. *Lancet* 2009 Aug 22; 374(9690):628-634
25. King R, Bambling M, Reid W, Thomas I. Telephone and online counselling for young people: a naturalistic comparison of session outcome, session impact and therapeutic alliance. *Counsell Psychother Res J* 2006 Sept; 6(3):175-181
26. Kordy H, Wolf M, Aulich K, Bürgy M, Hegerl U, Hüsing J, Puschner B, Rummel-Kluge C, Vedder H, Backenstrass M. Internet-delivered disease management for recurrent depression: a multicenter randomized controlled trial. *Psychother Psychosom* 2016; 85(2):91-8
27. Kramer J, Conijn B, Oijeveaar P, Riper H. Effectiveness of a web-based solution-focused brief chat treatment for depressed adolescents and young adults: randomized controlled trial. *J Med Internet Res* 2014 May 29; 16(5):e141
28. Lelutiu-Weinberger C, Pachankis JE, Gamarel KE, Surace A, Golub SA, Parsons JT. Feasibility, acceptability, and preliminary efficacy of a live-chat social media intervention to reduce HIV risk among young men who have sex with men. *AIDS Behav* 2015 Jul; 19(7):1214-27
29. Murphy L, Parnass P, Mitchell DL, Hallett RH, Cayley P, Seagram S. Client satisfaction and outcome comparisons of online and face-to-face counselling methods. *Br J Soc Work* 2009 Apr 15; 39(4):627-640
30. Schaub MP, Wenger A, Berg O, Beck T, Stark L, Buehler E, Haug S. A web-based self-help intervention with and without chat counseling to reduce cannabis use in problematic cannabis users: three-arm randomized controlled trial. *J Med Internet Res* 2015 Oct 13; 17(10):e232
31. Wentz E, Nydén A, Krevers B. Development of an internet-based support and coaching model for adolescents and young adults with ADHD and autism spectrum disorders: a pilot study. *Eur Child Adolesc Psychiatry* 2012 Nov; 21(11):611-22
