# Supplementary material for: Application of Synchronous Text-Based Dialogue Systems in Mental Health Interventions: Systematic Review
Source: J Med Internet Res. 2017 Jul 21;19(8):e267. doi: 10.2196/jmir.7023 (PMC5595406; doi:10.2196/jmir.7023)
Supplement: Multimedia Appendix 1 [file jmir_v19i8e267_app1.pdf]

Multimedia Appendix 2. Summary of feasibility and acceptability studies of synchronous text-based psychological interventions.

| Study                                        | Type of intervention          | Other technologies                                                                                                                                              | Support service                                                                                                    | Interventionists                                                                                                         | Population                                  | Outcome                                                                                   | Implications                                                                                                       |
|----------------------------------------------|-------------------------------|-----------------------------------------------------------------------------------------------------------------------------------------------------------------|--------------------------------------------------------------------------------------------------------------------|--------------------------------------------------------------------------------------------------------------------------|---------------------------------------------|-------------------------------------------------------------------------------------------|--------------------------------------------------------------------------------------------------------------------|
| S15. Baumei (2015), United States [32]       | Web and app based chat system | Web-based training modules (text, video, and quiz); Online profiles; Automatically triggered counseling tips for listeners during chat; Web-based questionnaire | Emotional support, for example, relationship issues, loneliness, depression, anxiety, and other emotional problems | Volunteers who conducted a computerized training program on active-listening                                             | General population                          | Users rated service provide by volunteers as helpful as psychotherapy and as more genuine | Training of volunteers can be made scalable with Web-based computerized modules on general counseling skills       |
| S16. Baumei et al (2016), United States [33] | Web and app based chat system | Web-based training modules (text, video, and quiz) Online profiles; Disorder specific training modules; Web-based questionnaire                                 | Emotional support to complement ongoing treatment                                                                  | Trained and experienced volunteers who conducted Web-based training in active listening and a disorder specific training | Schizophrenia-spectrum disorder patients    | Users rated service provided by volunteers as helpful as psychotherapy and more genuine.  | Volunteers can be trained on the Web with computerized modules to provide emotional support for specific disorders |
| S17. Baumei et al (2016), United States [34] | Web and app based chat system | Web-based training modules (text, video, and quiz) Online profiles; Disorder specific                                                                           | Single session of chat support                                                                                     | Trained and experienced volunteers who conducted Web-based training in active listening and a disorder specific training | Women with perinatal depression and anxiety | Service was rated as usable and useful. Strong interest for peer-support                  | Online support outside regular therapy times could help to meet patients' support needs                            |

| Study                                            | Type of intervention                                                        | Other technologies                                                                                               | Support service                                                                     | Interventionists                                                                                                              | Population                                                                                                                      | Outcome                                                                                                               | Implications                                                                                                               |
|--------------------------------------------------|-----------------------------------------------------------------------------|------------------------------------------------------------------------------------------------------------------|-------------------------------------------------------------------------------------|-------------------------------------------------------------------------------------------------------------------------------|---------------------------------------------------------------------------------------------------------------------------------|-----------------------------------------------------------------------------------------------------------------------|----------------------------------------------------------------------------------------------------------------------------|
|                                                  |                                                                             | training modules                                                                                                 |                                                                                     |                                                                                                                               |                                                                                                                                 |                                                                                                                       |                                                                                                                            |
| S18. Dowling and Rickwood (2014), Australia [35] | Web-based chat service (eheadspace) —multiple sessions                      | Virtual waiting room<br>Web-based advertisement<br>Email<br>Web-based questionnaires (pre and post intervention) | Support relating to psychological, psychosocial, vocational, and educational issues | Youth mental health clinicians with qualifications in psychology, occupational therapy, mental health nursing, or social work | Young people 16-25 years with mental health issues (eg, anxiety and depression, relationships; suicidal ideation and self-harm) | Highly distressed visitors but significant reduction after intervention                                               | Although multi-session interventions have better treatment outcomes, a single session is the preferred choice of visitors  |
| S19. Dowling and Rickwood (2016), Australia [36] | Web-based chat service (eheadspace)                                         | Virtual waiting room<br>Web-based advertisement<br>Web-based Questionnaires                                      | Support relating to psychological, psychosocial, vocational, and educational issues | Youth mental health clinicians with qualifications in psychology, occupational therapy, mental health nursing, or social work | Young people 16-25 years in virtual waiting room of mental health chat-service                                                  | Web-based chat clients: are highly distressed; have very low levels of hope; have high treatment outcome expectations | Uses Web-based tools such as questionnaires beforehand. The data collected with these tools could help session preparation |
| S20. Gaffney et al (2014), United Kingdom [37]   | Automated instant messenger chat interface(s) with a computerized therapist | Manage Your Life Online chatbot; ELIZA, a chatbot from 1966                                                      | Supporting the process of recognition using Method of Levels psychotherapy approach | Chatbot(s)                                                                                                                    | Preselected university students with a problem that causes them distress                                                        | Distress, depression, anxiety, and stress were reduced after interactions with one of the chatbots                    | Chatbots could potentially take over some restricted and predefined tasks in an online psychotherapy session               |
| S21. Lindenberg et al. (2011), Ireland [38]      | Web-based chat service with counselor and group                             | Psychoeducational Web page, Online forum, monitoring and feedback program                                        | Prevention of eating disorders                                                      | Professional counselors                                                                                                       | College students                                                                                                                | Chat features were considered a good concept; Few participants actually used individual                               | Web-based stepped-care modules can be used to augment and personalize interventions                                        |

| Study                                         | Type of intervention           | Other technologies                                                                                                                              | Support service                                                                                                                          | Interventionists          | Population                                                                      | Outcome                                                                                                                                                                                                                                                                                                                                                                                                         | Implications                                                                                                                                                                                                                                                                                                                                                 |
|-----------------------------------------------|--------------------------------|-------------------------------------------------------------------------------------------------------------------------------------------------|------------------------------------------------------------------------------------------------------------------------------------------|---------------------------|---------------------------------------------------------------------------------|-----------------------------------------------------------------------------------------------------------------------------------------------------------------------------------------------------------------------------------------------------------------------------------------------------------------------------------------------------------------------------------------------------------------|--------------------------------------------------------------------------------------------------------------------------------------------------------------------------------------------------------------------------------------------------------------------------------------------------------------------------------------------------------------|
|                                               |                                |                                                                                                                                                 |                                                                                                                                          |                           |                                                                                 | chat;<br>Most participants found program through Web-based search (67.65%)                                                                                                                                                                                                                                                                                                                                      |                                                                                                                                                                                                                                                                                                                                                              |
| S22.<br>Pietrabissa, et al (2015), Italy [39] | Chat functionality in Facebook | Advertisement through public Facebook psychology issue discussion groups; Email; Friendship request on Facebook; Google forms for questionnaire | Preliminary advice and discussion around participants' main psychological issues (eg, depression, anxiety, and relationship difficulties | Professional psychologist | All age groups, 44.8% with at least one session with a psychologist in the past | Web-based articles on the Web page and social network services, as well as Web -searches were the main pathway to the service. Most (79.2%) of participants stated to prefer the Web over in-person consultation; Mostly because of immediacy of support, economic convenience and lack of knowledge about other services. About half (48%) of the respondents to the follow-up questionnaire requested further | Social network sites such as Facebook have become increasingly popular and should be considered as a platform for psychological service for individuals (with Facebook chat), as well as a means to communicate and inform larger amounts of people (in Facebook groups); Web-based chat can be a gateway and help motivate people seeking professional help |

| Study                                          | Type of intervention     | Other technologies                                                                                                                                                   | Support service                                  | Interventionists                           | Population                                                                               | Outcome                                                                                                                                                                                                             | Implications                                                                                                                                                      |
|------------------------------------------------|--------------------------|----------------------------------------------------------------------------------------------------------------------------------------------------------------------|--------------------------------------------------|--------------------------------------------|------------------------------------------------------------------------------------------|---------------------------------------------------------------------------------------------------------------------------------------------------------------------------------------------------------------------|-------------------------------------------------------------------------------------------------------------------------------------------------------------------|
|                                                |                          |                                                                                                                                                                      |                                                  |                                            |                                                                                          | psychological support                                                                                                                                                                                               |                                                                                                                                                                   |
| S23. Reynolds et al (2013), United States [40] | Chat (or email exchange) | Web-based questionnaire<br>Web-based site with personal login for clients and 2 weeks history;<br>Reminder email service                                             | Psychotherapy (including depression and anxiety) | Predominantly US licensed psychotherapists | 19-55 year old people recruited from various mental health sites (Web-based and regular) | Session impact and therapeutic alliance scores were equally as strong or stronger than for face-to-face therapies in other studies; Lower arousal ratings for intervention compared with previous face-to-face data | Web-based text based psychotherapy has promising potential as a therapy form; Online interventions might benefit from a calming effect compared with face-to-face |
| S24. Rodda and Lubman (2014), Australia [41]   | Web-based chat           | Email Push-page technology (to reuse previously developed content in chat)<br>Profile page for visitor with referral info, assessment results, and previous sessions | Counseling service for problem gambling          | Trained gambling counselors                | Open to all age groups                                                                   | About one third of registered visitors returned for second session; New treatment seekers are more often male and under 30 years                                                                                    | Web-based chat is a viable alternate mode of service delivery that attracts new treatment cohorts                                                                 |

## References

32. Baumel A. Online emotional support delivered by trained volunteers: users' satisfaction and their perception of the service compared to psychotherapy. J Ment Health 2015; 24(5):313-20

33. Baume A, Correll CU, Birnbaum M. Adaptation of a peer based online emotional support program as an adjunct to treatment for people with schizophrenia-spectrum disorders. *Internet Interv* 2016 May; 4(Part 1):35-42
34. Baume A, Schueller SM. Adjusting an available online peer support platform in a program to supplement the treatment of perinatal depression and anxiety. *JMIR Ment Health* 2016 Mar 21; 3(1):e11
35. Dowling M, Rickwood D. Investigating individual online synchronous chat counselling processes and treatment outcomes for young people. *Advances in Mental Health* 2014; 12(3):216-224
36. Dowling M, Rickwood D. Exploring hope and expectations in the youth mental health online counselling environment. *Comput Human Behav* 2016 Feb; 55(Part A):62-68
37. Gaffney H, Mansell W, Edwards R, Wright J. Manage Your Life Online (MYLO): a pilot trial of a conversational computer-based intervention for problem solving in a student sample. *Behav Cogn Psychother* 2014 Nov; 42(6):731-46
38. Lindenberg K, Moessner M, Harney J, McLaughlin O, Bauer S. E-health for individualized prevention of eating disorders. *Clin Pract Epidemiol Ment Health* 2011; 7:74-83
39. Pietrabissa G, Manzoni G, Algeri D, Mazzucchelli L, Carella A, Pagnini F, Castelnovo G. Facebook use as access facilitator for consulting psychology. *Aust Psychol* 2015 Jul 20; 50(4):299-303
40. Reynolds Jr DJ, Stiles WB, Bailer AJ, Hughes MR. Impact of exchanges and client-therapist alliance in online-text psychotherapy. *Cyberpsychol Behav Soc Netw* 2013 May; 16(5):370-7
41. Rodda S, Lubman DI. Characteristics of gamblers using a national online counselling service for problem gambling. *J Gambl Stud* 2014 Jun; 30(2):277-89
